# Supplementary material
Source: PubMed Central journal article supplement (PMC6346268)
Supplement: NIHMS1006898-supplement-1.pdf [file NIHMS1006898-supplement-1.pdf]

Distress and dementia risk

Supplemental Table 1

*Psychological Distress and Self-Beliefs and Risk of Incident Dementia and CIND Controlling for APOE risk status or Polygenic Scores for Alzheimer's Disease*

| Construct             | Dementia         |                  | CIND             |                  |
|-----------------------|------------------|------------------|------------------|------------------|
|                       | Model 1          | Model 2          | Model 1          | Model 2          |
| Anxiety               | 1.28 (1.16-1.42) | 1.30 (1.17-1.46) | 1.20 (1.16-1.25) | 1.22 (1.17-1.28) |
| Negative Affect       | 1.32 (1.18-1.47) | 1.33 (1.17-1.50) | 1.19 (1.14-1.24) | 1.20 (1.14-1.26) |
| Hostility             | 1.25 (1.11-1.40) | 1.20 (1.06-1.36) | 1.13 (1.08-1.18) | 1.14 (1.09-1.20) |
| Anger In              | 1.04 (.93-1.17)  | 1.00 (.88-1.13)  | 1.02 (.98-1.07)  | 1.00 (.96-1.05)  |
| Anger Out             | 1.13 (1.02-1.26) | 1.14 (1.02-1.29) | 1.05 (1.01-1.10) | 1.07 (1.02-1.12) |
| Pessimism             | 1.36 (1.21-1.51) | 1.41 (1.25-1.59) | 1.23 (1.18-1.28) | 1.24 (1.18-1.30) |
| Hopelessness          | 1.33 (1.20-1.47) | 1.41 (1.26-1.57) | 1.18 (1.14-1.23) | 1.20 (1.15-1.26) |
| Perceived constraints | 1.31 (1.18-1.44) | 1.30 (1.16-1.45) | 1.19 (1.14-1.24) | 1.21 (1.16-1.26) |

## Distress and dementia risk

*Note.* Coefficients are hazard ratios (95% confidence intervals) from Cox regression. Model 1 controls for demographic characteristics (age, gender, race, ethnicity, education) and APOE risk status. Model 2 controls for demographic characteristics (age, gender, race, ethnicity, education) and polygenic risk score.
